# Supplementary material for: Regulation of the structure and density of KN5 frameworks with CH3COOK and CF3COOK
Source: Royal Society of Chemistry journal article supplement (doi:10.1039/d3ce01210g), 2024-01-01
Supplement: d3ce01210g1.pdf [file d3ce01210g1.pdf]

## Supporting Information

# Regulation of structure and density of $\text{KN}_5$ framework *via* $\text{CH}_3\text{COOK}$ and $\text{CF}_3\text{COOK}$

Shuaijie Jiang, Jianxin Zhou, Yuangang Xu\*, Qiuhan Lin, Pengcheng Wang\*, Ming Lu

*School of Chemistry and Chemical Engineering, Nanjing University of Science and Technology, Nanjing 210094, China*

### Corresponding Author

Yuangang Xu: [yuangangxu@163.com](mailto:yuangangxu@163.com)

Pengcheng Wang: [alexwpch@njust.edu.cn](mailto:alexwpch@njust.edu.cn)

### Table of Contents

|                                              |     |
|----------------------------------------------|-----|
| 1. Single-crystal X-ray diffraction analysis | S1  |
| 2. Powder X-ray diffraction (PXRD) pattern   | S12 |

## 1. Single-crystal X-ray diffraction analysis

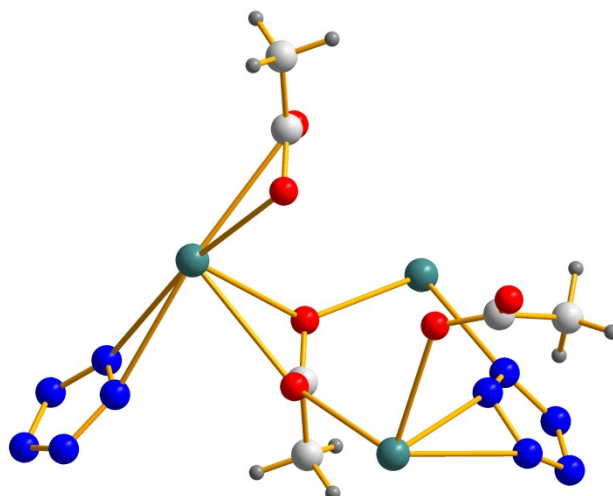

**Fig. S1** The asymmetric unit of framework **1**.

**Table S1** Crystallographic data of compound **1**

|                             |                                                                                                                                                                                                                                    |
|-----------------------------|------------------------------------------------------------------------------------------------------------------------------------------------------------------------------------------------------------------------------------|
| CCDC                        | 2208012                                                                                                                                                                                                                            |
| Crystal data                |                                                                                                                                                                                                                                    |
| Chemical formula            | $C_6H_9K_5N_{10}O_6$                                                                                                                                                                                                               |
| $M_r$                       | 512.73                                                                                                                                                                                                                             |
| Crystal system, space group | Trigonal, $P\bar{3}c1$                                                                                                                                                                                                             |
| Temperature (K)             | 243                                                                                                                                                                                                                                |
| $a, c$ (Å)                  | 10.3592 (2), 20.7675 (8)                                                                                                                                                                                                           |
| $V$ (Å <sup>3</sup> )       | 1930.04 (11)                                                                                                                                                                                                                       |
| $Z$                         | 4                                                                                                                                                                                                                                  |
| Radiation type              | Mo $K\alpha$                                                                                                                                                                                                                       |
| $\mu$ (mm <sup>-1</sup> )   | 1.19                                                                                                                                                                                                                               |
| Crystal size (mm)           | 0.13 × 0.12 × 0.1                                                                                                                                                                                                                  |
| Data collection             |                                                                                                                                                                                                                                    |
| Diffractometer              | Bruker <i>APEX-II</i> CCD                                                                                                                                                                                                          |
| Absorption correction       | Multi-scan<br><i>SADABS2016/2</i> (Bruker,2016/2) was used for absorption correction.<br>wR2(int) was 0.0732 before and 0.0552 after correction. The Ratio of minimum to maximum transmission is 0.8836. The 1/2 correction factor |

|                                                                       |                               |
|-----------------------------------------------------------------------|-------------------------------|
|                                                                       | is Not present.               |
| $T_{\min}, T_{\max}$                                                  | 0.659, 0.745                  |
| No. of measured, independent and observed [ $I > 2s(I)$ ] reflections | 10672, 1152, 985              |
| $R_{\text{int}}$                                                      | 0.046                         |
| $(\sin \theta/\lambda)_{\text{max}}$ ( $\text{\AA}^{-1}$ )            | 0.595                         |
| Refinement                                                            |                               |
| $R[F^2 > 2s(F^2)], wR(F^2), S$                                        | 0.027, 0.062, 1.14            |
| No. of reflections                                                    | 1152                          |
| No. of parameters                                                     | 143                           |
| No. of restraints                                                     | 105                           |
| H-atom treatment                                                      | H-atom parameters constrained |
| $D\rho_{\text{max}}, D\rho_{\text{min}}$ ( $\text{e \AA}^{-3}$ )      | 0.28, -0.32                   |

**Table S2.** Bond lengths [ $\text{\AA}$ ] for **1**.

|               |             |              |             |
|---------------|-------------|--------------|-------------|
| K001—K002i    | 4.5045 (12) | K003—O005    | 2.8627 (15) |
| K001—K003ii   | 3.8042 (6)  | K003—O005iii | 3.0061 (17) |
| K001—K003iii  | 3.8042 (6)  | K003—N5      | 2.9340 (11) |
| K001—K003iv   | 3.8042 (6)  | K003—N4      | 3.20 (4)    |
| K001—O004v    | 2.6833 (15) | O004—C006    | 1.259 (2)   |
| K001—O004vi   | 2.6833 (15) | O005—C006    | 1.255 (3)   |
| K001—O004     | 2.6833 (15) | C006—C007    | 1.506 (3)   |
| K001—N008     | 3.011 (12)  | C007—H00A    | 0.9700      |
| K001—N1       | 3.069 (12)  | C007—H00B    | 0.9700      |
| K002—K003vii  | 3.8038 (6)  | C007—H00C    | 0.9700      |
| K002—K003viii | 3.8038 (6)  | N009—N008    | 1.294 (7)   |
| K002—K003iii  | 3.8038 (6)  | N009—N2      | 1.327 (8)   |

|               |             |         |            |
|---------------|-------------|---------|------------|
| K002—O005ix   | 2.6830 (15) | N008—N1 | 1.318 (7)  |
| K002—O005     | 2.6830 (15) | N1—N3   | 1.316 (7)  |
| K002—O005x    | 2.6830 (16) | N3—N2   | 1.298 (7)  |
| K002—N009     | 2.763 (6)   | N5—N4   | 1.302 (17) |
| K003—K003iii  | 3.6305 (10) | N5—N8   | 1.312 (13) |
| K003—O004iii  | 3.0098 (17) | N4—N6   | 1.302 (16) |
| K003—O004     | 2.8637 (15) | N6—N9   | 1.306 (13) |
| K003—O004viii | 2.9554 (16) | N8—N9   | 1.302 (13) |

Symmetry code(s): (i)  $y, x, -z+3/2$ ; (ii)  $y, -x+y+1, -z+1$ ; (iii)  $-x+1, -y+1, -z+1$ ; (iv)  $x-y, x, -z+1$ ; (v)  $-x+y, -x+1, z$ ; (vi)  $-y+1, x-y+1, z$ ; (vii)  $x-y+1, x, -z+1$ ; (viii)  $y, -x+y, -z+1$ ; (ix)  $-y+1, x-y, z$ ; (x)  $-x+y+1, -x+1, z$ .

**Table S3.** Torsion angles [°] of **1**.

|                       |              |                      |              |
|-----------------------|--------------|----------------------|--------------|
| K001—O004—C006—O005   | -120.2 (2)   | K003i—O005—C006—C007 | -142.04 (19) |
| K001—O004—C006—C007   | 59.7 (3)     | K003—O005—C006—C007  | 141.58 (19)  |
| K001—N008—N1—N3       | 159.4 (5)    | K003—N5—N4—N6        | -158 (2)     |
| K001—N1—N3—N2         | 93 (3)       | K003—N5—N8—N9        | 127 (4)      |
| K002—O005—C006—O004   | 120.5 (2)    | K003—N4—N6—N9        | -71 (6)      |
| K002—O005—C006—C007   | -59.3 (3)    | N009—N008—N1—K001    | -158.8 (5)   |
| K002—N009—N008—K001   | 54 (3)       | N009—N008—N1—N3      | 0.6 (7)      |
| K002—N009—N008—N1     | 163.7 (5)    | N008—N009—N2—N3      | 0.0 (7)      |
| K002—N009—N2—N3       | -164.4 (6)   | N008—N1—N3—N2        | -0.6 (7)     |
| K003i—O004—C006—O005  | -37.8 (2)    | N1—N3—N2—N009        | 0.4 (7)      |
| K003ii—O004—C006—O005 | 134.57 (17)  | N2—N009—N008—K001    | -110 (3)     |
| K003—O004—C006—O005   | 38.5 (2)     | N2—N009—N008—N1      | -0.3 (7)     |
| K003—O004—C006—C007   | -141.60 (19) | N5—N4—N6—N9          | 0.0 (3)      |
| K003ii—O004—C006—C007 | -45.5 (2)    | N5—N8—N9—N6          | -0.1 (7)     |
| K003i—O004—C006—C007  | 142.10 (19)  | N4—N5—N8—N9          | 0.0 (6)      |
| K003i—O005—C006—O004  | 37.8 (2)     | N4—N6—N9—N8          | 0.1 (6)      |
| K003—O005—C006—O004   | -38.5 (2)    | N8—N5—N4—K003        | 158 (2)      |

|                        |              |             |         |
|------------------------|--------------|-------------|---------|
| K003iii—O005—C006—O004 | -134.61 (17) | N8—N5—N4—N6 | 0.0 (3) |
| K003iii—O005—C006—C007 | 45.5 (2)     |             |         |

Symmetry code(s): (i)  $-x+1, -y+1, -z+1$ ; (ii)  $x-y, x, -z+1$ ; (iii)  $y, -x+y, -z+1$ .

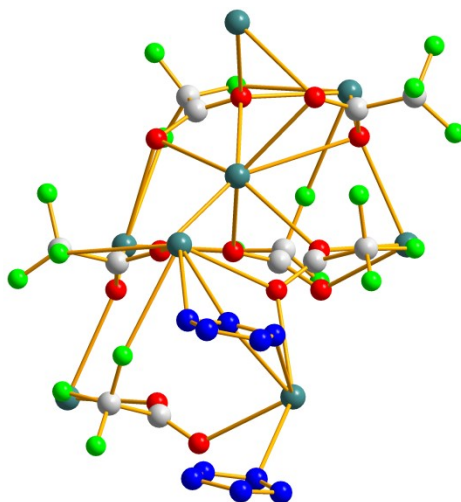

**Fig. S2** The asymmetric unit of framework **2**.

**Table S4** Crystallographic data of compound **2**

|                             |                                        |
|-----------------------------|----------------------------------------|
| CCDC                        | 2208013                                |
| Crystal data                |                                        |
| Chemical formula            | $C_{12}F_{18}K_8N_{10}O_{12}$          |
| $M_r$                       | 1131.02                                |
| Crystal system, space group | Orthorhombic, $Pna2_1$                 |
| Temperature (K)             | 170                                    |
| $a, b, c$ (Å)               | 23.7161 (16), 7.1980 (7), 20.5953 (18) |
| $V$ (Å <sup>3</sup> )       | 3515.8 (5)                             |
| $Z$                         | 4                                      |
| Radiation type              | Mo $K\alpha$                           |
| $\mu$ (mm <sup>-1</sup> )   | 1.14                                   |
| Crystal size (mm)           | 0.15 × 0.08 × 0.05                     |
| Data collection             |                                        |
| Diffractometer              | Bruker <i>APEX-II</i> CCD              |
| Absorption correction       | Multi-scan                             |

|                                                                       |                                                                                                                                                                                                                                              |
|-----------------------------------------------------------------------|----------------------------------------------------------------------------------------------------------------------------------------------------------------------------------------------------------------------------------------------|
|                                                                       | <i>SADABS2016/2</i> (Bruker,2016/2) was used for absorption correction. $wR2(\text{int})$ was 0.0903 before and 0.0693 after correction. The Ratio of minimum to maximum transmission is 0.8578. The $l/2$ correction factor is Not present. |
| $T_{\text{min}}, T_{\text{max}}$                                      | 0.639, 0.745                                                                                                                                                                                                                                 |
| No. of measured, independent and observed [ $I > 2s(I)$ ] reflections | 20259, 5798, 3453                                                                                                                                                                                                                            |
| $R_{\text{int}}$                                                      | 0.074                                                                                                                                                                                                                                        |
| $(\sin \theta/\lambda)_{\text{max}}$ ( $\text{\AA}^{-1}$ )            | 0.626                                                                                                                                                                                                                                        |
| Refinement                                                            |                                                                                                                                                                                                                                              |
| $R[F^2 > 2s(F^2)]$ , $wR(F^2)$ , $S$                                  | 0.073, 0.227, 1.02                                                                                                                                                                                                                           |
| No. of reflections                                                    | 5798                                                                                                                                                                                                                                         |
| No. of parameters                                                     | 569                                                                                                                                                                                                                                          |
| No. of restraints                                                     | 56                                                                                                                                                                                                                                           |
|                                                                       | $w = 1/[s^2(F_o^2) + (0.110P)^2 + 11.5328P]$<br>where $P = (F_o^2 + 2F_c^2)/3$                                                                                                                                                               |
| $D\rho_{\text{max}}, D\rho_{\text{min}}$ ( $e \text{\AA}^{-3}$ )      | 1.26, -0.53                                                                                                                                                                                                                                  |
| Absolute structure                                                    | Flack $x$ determined using 984 quotients $[(I^+)-(I^-)]/[(I^+)+(I^-)]$ (Parsons, Flack and Wagner, Acta Cryst. B69 (2013) 249-259).                                                                                                          |
| Absolute structure parameter                                          | -0.01 (4)                                                                                                                                                                                                                                    |

**Table S5** Bond lengths [ $\text{\AA}$ ] for **2**.

|                      |            |                        |            |
|----------------------|------------|------------------------|------------|
| K5—K6                | 3.616 (5)  | O7—K13                 | 2.92 (6)   |
| K5—K6 <sup>i</sup>   | 3.582 (5)  | F15—C10                | 1.321 (15) |
| K5—O3                | 2.834 (10) | F10—C7                 | 1.304 (17) |
| K5—O9                | 2.784 (10) | F14—C10                | 1.288 (14) |
| K5—O2                | 2.789 (10) | F14—K11 <sup>vii</sup> | 3.32 (6)   |
| K5—O11 <sup>ii</sup> | 2.825 (10) | F12—C7                 | 1.297 (17) |
| K5—O5                | 2.837 (11) | F12—K10 <sup>iv</sup>  | 3.29 (6)   |
| K5—O7                | 2.805 (11) | F7—C6                  | 1.321 (15) |

|                       |            |                       |            |
|-----------------------|------------|-----------------------|------------|
| K5—O12 <sup>ii</sup>  | 3.005 (12) | F4—C4                 | 1.306 (14) |
| K5—O4                 | 3.071 (11) | F4—K10 <sup>ii</sup>  | 3.35 (6)   |
| K5—O6                 | 3.012 (11) | O8—C8                 | 1.286 (15) |
| K6—O3                 | 2.787 (10) | O8—K11                | 2.41 (6)   |
| K6—O9 <sup>ii</sup>   | 2.819 (10) | F18—C11               | 1.337 (12) |
| K6—O2 <sup>ii</sup>   | 2.844 (11) | O1—C2                 | 1.259 (13) |
| K6—O11 <sup>ii</sup>  | 2.767 (11) | O1—K9                 | 2.57 (5)   |
| K6—O5                 | 2.771 (11) | F6—C4                 | 1.319 (14) |
| K6—O7 <sup>ii</sup>   | 2.817 (11) | F6—K14 <sup>iii</sup> | 3.34 (6)   |
| K6—O8 <sup>ii</sup>   | 3.090 (11) | F9—C6                 | 1.300 (16) |
| K6—O1 <sup>ii</sup>   | 3.046 (12) | F9—K9 <sup>vi</sup>   | 3.33 (6)   |
| K6—O10 <sup>ii</sup>  | 3.052 (11) | F3—C1                 | 1.313 (12) |
| K8—K7 <sup>i</sup>    | 4.491 (6)  | O12—C12               | 1.263 (13) |
| K8—K7                 | 4.480 (5)  | O12—K10               | 2.47 (6)   |
| K8—O2                 | 2.726 (11) | O4—C3                 | 1.271 (15) |
| K8—F14 <sup>iii</sup> | 3.057 (12) | O4—K12                | 2.53 (6)   |
| K8—O8                 | 2.698 (11) | F1—C1                 | 1.296 (16) |
| K8—O4                 | 2.791 (12) | F1—K12 <sup>x</sup>   | 3.29 (5)   |
| K8—F5 <sup>i</sup>    | 2.920 (13) | O6—C5                 | 1.252 (14) |
| K8—N7 <sup>iv</sup>   | 3.196 (18) | O6—K14 <sup>ii</sup>  | 2.59 (6)   |
| K8—N3 <sup>iv</sup>   | 2.928 (15) | O10—C9                | 1.249 (15) |
| K8—N8 <sup>iv</sup>   | 2.942 (14) | O10—K13               | 2.49 (6)   |
| K7—O5                 | 2.728 (10) | F17—C11               | 1.299 (17) |
| K7—F12 <sup>ii</sup>  | 3.334 (14) | F17—K13 <sup>xi</sup> | 3.40 (6)   |
| K7—O8 <sup>ii</sup>   | 2.776 (12) | F2—C1                 | 1.363 (16) |
| K7—O4                 | 2.705 (12) | F2—K10 <sup>ii</sup>  | 2.29 (4)   |
| K7—F1 <sup>v</sup>    | 3.118 (14) | F13—C10               | 1.379 (15) |
| K7—N2 <sup>v</sup>    | 2.941 (16) | F13—K14 <sup>ii</sup> | 2.26 (4)   |
| K7—N7 <sup>iv</sup>   | 2.897 (15) | F11—C7                | 1.370 (18) |
| K7—N3 <sup>v</sup>    | 3.210 (17) | F16—C11               | 1.344 (17) |
| K4—K3                 | 4.464 (5)  | F8—C6                 | 1.309 (17) |
| K4—K3 <sup>ii</sup>   | 4.505 (5)  | F8—K13 <sup>ii</sup>  | 2.38 (6)   |

|                       |            |                       |            |
|-----------------------|------------|-----------------------|------------|
| K4—O7                 | 2.724 (9)  | C9—C10                | 1.5180 (2) |
| K4—O6                 | 2.786 (13) | F5—C4                 | 1.373 (16) |
| K4—O10                | 2.713 (12) | F5—K11 <sup>ii</sup>  | 2.28 (4)   |
| K4—F8 <sup>i</sup>    | 2.992 (15) | C8—C7                 | 1.5180 (2) |
| K4—N9 <sup>vi</sup>   | 2.963 (16) | C5—C6                 | 1.5180 (2) |
| K4—N10 <sup>vi</sup>  | 3.302 (18) | C3—C4                 | 1.5180 (2) |
| K4—N4 <sup>vi</sup>   | 3.148 (16) | N6—N10                | 1.27 (2)   |
| K4—N5 <sup>vi</sup>   | 2.910 (16) | N6—N7                 | 1.30 (2)   |
| K3—O11                | 2.751 (11) | N6—K10                | 2.44 (7)   |
| K3—F6 <sup>vii</sup>  | 3.194 (14) | N6—K12 <sup>ix</sup>  | 3.42 (6)   |
| K3—O6 <sup>i</sup>    | 2.742 (11) | C2—C1                 | 1.5180 (2) |
| K3—O10                | 2.793 (12) | N1—N2                 | 1.29 (2)   |
| K3—F13 <sup>i</sup>   | 2.914 (12) | N1—N5                 | 1.28 (2)   |
| K3—N9 <sup>vi</sup>   | 2.964 (17) | N1—K9                 | 2.48 (7)   |
| K3—N4 <sup>viii</sup> | 2.931 (17) | C12—C11               | 1.5180 (2) |
| K3—N8 <sup>vi</sup>   | 3.006 (15) | N9—N10                | 1.29 (2)   |
| K2—K1                 | 4.469 (5)  | N9—N8                 | 1.317 (19) |
| K2—K1 <sup>i</sup>    | 4.499 (5)  | N9—K13 <sup>xi</sup>  | 2.42 (6)   |
| K2—O3 <sup>i</sup>    | 2.745 (11) | N2—N3                 | 1.33 (2)   |
| K2—F12 <sup>ix</sup>  | 3.082 (11) | C11—F16A              | 1.36 (2)   |
| K2—F4 <sup>i</sup>    | 3.204 (11) | N10—K9 <sup>i</sup>   | 3.47 (6)   |
| K2—O1                 | 2.762 (12) | N10—K13 <sup>xi</sup> | 2.86 (6)   |
| K2—O12                | 2.711 (11) | N4—N5                 | 1.28 (2)   |
| K2—F2 <sup>i</sup>    | 2.912 (13) | N4—N3                 | 1.29 (2)   |
| K2—N6                 | 2.908 (15) | N4—K11 <sup>ix</sup>  | 3.47 (6)   |
| K2—N1                 | 3.021 (16) | N4—K14 <sup>xii</sup> | 2.45 (6)   |
| K1—O9                 | 2.725 (11) | N5—K13 <sup>xi</sup>  | 3.38 (5)   |
| K1—O1                 | 2.747 (11) | N5—K14 <sup>xii</sup> | 3.17 (6)   |
| K1—O12 <sup>ii</sup>  | 2.798 (13) | N7—N8                 | 1.32 (2)   |
| K1—F17 <sup>ii</sup>  | 3.150 (14) | N7—K12 <sup>ix</sup>  | 2.49 (5)   |
| K1—N6 <sup>ii</sup>   | 3.180 (17) | N3—K11 <sup>ix</sup>  | 2.57 (6)   |
| K1—N1                 | 2.923 (16) | N3—K14 <sup>xii</sup> | 3.42 (6)   |



|                      |            |                         |             |
|----------------------|------------|-------------------------|-------------|
| K1—N10 <sup>ii</sup> | 2.920 (17) | N8—K12 <sup>ix</sup>    | 3.44 (5)    |
| O3—C3                | 1.214 (12) | N8—K14 <sup>xi</sup>    | 3.44 (5)    |
| O3—K10 <sup>ii</sup> | 2.83 (8)   | K9—K10                  | 4.469 (5)   |
| O9—C9                | 1.242 (12) | K9—K10 <sup>ii</sup>    | 4.48 (7)    |
| O9—K9                | 2.82 (8)   | K10—K12 <sup>ix</sup>   | 4.64 (8)    |
| O2—C2                | 1.231 (13) | K12—K11                 | 4.480 (6)   |
| O2—K11               | 2.70 (6)   | K12—K11 <sup>ii</sup>   | 4.50 (8)    |
| O11—C12              | 1.221 (13) | K11—K14 <sup>xiii</sup> | 4.66 (7)    |
| O11—K14              | 2.85 (6)   | K13—K14 <sup>ii</sup>   | 4.47 (8)    |
| O5—C5                | 1.224 (14) | K13—K14                 | 4.4630 (14) |
| O5—K12               | 2.77 (6)   | K13—F16A <sup>vi</sup>  | 3.35 (6)    |
| O7—C8                | 1.234 (14) |                         |             |

Symmetry code(s): (i)  $x, y-1, z$ ; (ii)  $x, y+1, z$ ; (iii)  $x+1/2, -y+3/2, z$ ; (iv)  $-x+1, -y+1, z-1/2$ ; (v)  $-x+1, -y+2, z-1/2$ ; (vi)  $-x+1/2, y+1/2, z-1/2$ ; (vii)  $x-1/2, -y+3/2, z$ ; (viii)  $-x+1/2, y-1/2, z-1/2$ ; (ix)  $-x+1, -y+1, z+1/2$ ; (x)  $-x+1, -y+2, z+1/2$ ; (xi)  $-x+1/2, y-1/2, z+1/2$ ; (xii)  $-x+1/2, y+1/2, z+1/2$ ; (xiii)  $x+1/2, -y+1/2, z$ .

**Table S6** Torsion angles [ $^{\circ}$ ] of **2**.

|                              |             |                               |             |
|------------------------------|-------------|-------------------------------|-------------|
| K5—O3—C3—O4                  | 16.9 (15)   | O2—C2—C1—F2                   | 92.9 (12)   |
| K5—O3—C3—C4                  | -155.5 (9)  | O11—C12—C11—F18               | 14.3 (17)   |
| K5—O9—C9—O10                 | 66.9 (16)   | O11—C12—C11—F17               | 134.1 (13)  |
| K5—O9—C9—C10                 | -121.6 (10) | O11—C12—C11—F16               | -100.1 (18) |
| K5—O2—C2—O1                  | 69.8 (16)   | O11—C12—C11—F16A              | -123 (2)    |
| K5—O2—C2—C1                  | -122.9 (9)  | O5—C5—C6—F7                   | 16.6 (16)   |
| K5 <sup>i</sup> —O11—C12—O12 | 18.0 (14)   | O5—C5—C6—F9                   | 138.6 (14)  |
| K5 <sup>i</sup> —O11—C12—C11 | -155.5 (9)  | O5—C5—C6—F8                   | -104.5 (14) |
| K5—O5—C5—O6                  | 16.0 (15)   | O7—C8—C7—F10                  | -23.9 (18)  |
| K5—O5—C5—C6                  | -156.8 (8)  | O7—C8—C7—F12                  | -151.3 (15) |
| K5—O7—C8—O8                  | 68.8 (16)   | O7—C8—C7—F11                  | 93.5 (15)   |
| K5—O7—C8—C7                  | -123.7 (10) | O8—C8—C7—F10                  | 145.2 (13)  |
| K5 <sup>i</sup> —O12—C12—O11 | -16.7 (13)  | O8—C8—C7—F12                  | 17.8 (18)   |
| K5 <sup>i</sup> —O12—C12—C11 | 157.2 (8)   | O8—C8—C7—F11                  | -97.4 (15)  |
| K5—O4—C3—O3                  | -15.4 (14)  | F18—C11—F16A—K13 <sup>v</sup> | 112 (2)     |
| K5—O4—C3—C4                  | 157.3 (9)   | O1—C2—C1—F3                   | 144.0 (12)  |
| K5—O6—C5—O5                  | -14.9 (14)  | O1—C2—C1—F1                   | 18.3 (16)   |
| K5—O6—C5—C6                  | 158.0 (9)   | O1—C2—C1—F2                   | -98.3 (13)  |

|                   |             |                   |             |
|-------------------|-------------|-------------------|-------------|
| K6—O3—C3—O4       | -66.6 (16)  | O12—C12—C11—F18   | -159.9 (12) |
| K6—O3—C3—C4       | 121.0 (10)  | O12—C12—C11—F17   | -40.2 (14)  |
| K6i—O9—C9—O10     | -15.9 (15)  | O12—C12—C11—F16   | 85.7 (19)   |
| K6i—O9—C9—C10     | 155.6 (9)   | O12—C12—C11—F16A  | 62 (2)      |
| K6i—O2—C2—O1      | -12.2 (14)  | O4—C3—C4—F4       | -155.4 (13) |
| K6i—O2—C2—C1      | 155.1 (9)   | O4—C3—C4—F6       | -29.1 (17)  |
| K6i—O11—C12—O12   | -65.9 (16)  | O4—C3—C4—F5       | 87.3 (14)   |
| K6i—O11—C12—C11   | 120.6 (9)   | O6—C5—C6—F7       | -157.1 (13) |
| K6—O5—C5—O6       | -66.9 (16)  | O6—C5—C6—F9       | -35.1 (16)  |
| K6—O5—C5—C6       | 120.4 (9)   | O6—C5—C6—F8       | 81.8 (15)   |
| K6i—O7—C8—O8      | -14.0 (15)  | O10—C9—C10—F15    | 141.4 (12)  |
| K6i—O7—C8—C7      | 153.5 (9)   | O10—C9—C10—F14    | 16.5 (18)   |
| K6i—O8—C8—O7      | 12.6 (14)   | O10—C9—C10—F13    | -102.1 (14) |
| K6i—O8—C8—C7      | -155.2 (10) | F17—C11—F16A—K13v | 6 (2)       |
| K6i—O1—C2—O2      | 11.2 (13)   | N6—N7—N8—K8iv     | -129.9 (12) |
| K6i—O1—C2—C1      | -156.3 (9)  | N6—N7—N8—K3v      | 94 (2)      |
| K6i—O10—C9—O9     | 14.4 (14)   | N6—N7—N8—N9       | 2.2 (19)    |
| K6i—O10—C9—C10    | -157.2 (10) | N6—N7—N8—K12iv    | 165 (2)     |
| K8—O2—C2—O1       | -139.7 (10) | N6—N7—N8—K14v     | 100 (2)     |
| K8—O2—C2—C1       | 27.5 (18)   | N1—N2—N3—K8iv     | 146.0 (12)  |
| K8iii—F14—C10—F15 | 112.1 (14)  | N1—N2—N3—K7vi     | -135.1 (15) |
| K8iii—F14—C10—F13 | -0.4 (17)   | N1—N2—N3—N4       | -1 (2)      |
| K8iii—F14—C10—C9  | -119.8 (13) | N1—N2—N3—K11iv    | 164.4 (17)  |
| K8—O8—C8—O7       | -90.0 (15)  | N1—N2—N3—K14viii  | -28 (2)     |
| K8—O8—C8—C7       | 102.2 (11)  | C12—C11—F16A—K13v | -110 (3)    |
| K8—O4—C3—O3       | -111.1 (13) | N2—N1—N5—K4v      | -105.7 (15) |
| K8—O4—C3—C4       | 61.7 (13)   | N2—N1—N5—N4       | 0 (2)       |
| K8ii—F5—C4—F4     | -102.0 (16) | N2—N1—N5—K13v     | -96.5 (18)  |
| K8ii—F5—C4—F6     | 144.4 (14)  | N2—N1—N5—K14viii  | 39 (3)      |
| K8ii—F5—C4—C3     | 21 (2)      | N10—N6—N7—K8iv    | -76.9 (19)  |
| K8iv—N7—N8—N9     | 132.1 (14)  | N10—N6—N7—K7iv    | 142.3 (13)  |
| K7—O5—C5—O6       | 139.8 (11)  | N10—N6—N7—N8      | -4 (2)      |
| K7—O5—C5—C6       | -33.0 (15)  | N10—N6—N7—K12iv   | 161.0 (19)  |
| K7i—F12—C7—F10    | -111.3 (9)  | N10—N9—N8—K8iv    | 103.8 (16)  |
| K7i—F12—C7—F11    | 135.1 (8)   | N10—N9—N8—K3v     | -149.2 (14) |
| K7i—F12—C7—C8     | 18.8 (15)   | N10—N9—N8—N7      | 0 (2)       |
| K7i—O8—C8—O7      | 107.8 (13)  | N10—N9—N8—K12iv   | -17 (3)     |
| K7i—O8—C8—C7      | -59.9 (13)  | N10—N9—N8—K14v    | -138.3 (17) |
| K7—O4—C3—O3       | 88.0 (15)   | N5—N1—N2—K7vi     | -104.9 (16) |

|                 |             |                  |             |
|-----------------|-------------|------------------|-------------|
| K7—O4—C3—C4     | -99.2 (11)  | N5—N1—N2—N3      | 1 (2)       |
| K7vi—F1—C1—F3   | 112.2 (12)  | N5—N4—N3—K8iv    | -146.7 (13) |
| K7vi—F1—C1—F2   | -1.4 (12)   | N5—N4—N3—K7vi    | 75 (2)      |
| K7vi—F1—C1—C2   | -119.0 (11) | N5—N4—N3—N2      | 1 (2)       |
| K7vi—N2—N3—K8iv | -78.8 (10)  | N5—N4—N3—K11iv   | -164.5 (17) |
| K7vi—N2—N3—N4   | 133.8 (14)  | N5—N4—N3—K14viii | 143 (3)     |
| K7iv—N7—N8—K8iv | 81.9 (9)    | N7—N6—N10—K4v    | 75 (3)      |
| K7iv—N7—N8—K3v  | -54 (2)     | N7—N6—N10—K1i    | -127.8 (13) |
| K7iv—N7—N8—N9   | -145.9 (11) | N7—N6—N10—N9     | 4 (2)       |
| K4—O7—C8—K6i    | -128.7 (12) | N7—N6—N10—K9i    | -117.3 (17) |
| K4—O7—C8—O8     | -142.7 (11) | N7—N6—N10—K13v   | 52 (5)      |
| K4—O7—C8—C7     | 24.8 (17)   | N3—N4—N5—K4v     | 132.1 (14)  |
| K4—O6—C5—K6     | -155.6 (5)  | N3—N4—N5—N1      | -1 (2)      |
| K4—O6—C5—O5     | -114.3 (12) | N3—N4—N5—K13v    | 120.8 (17)  |
| K4—O6—C5—C6     | 58.7 (13)   | N3—N4—N5—K14viii | -150 (2)    |
| K4—O10—C9—K6i   | -104.6 (7)  | N8—N9—N10—K4v    | -151.5 (15) |
| K4—O10—C9—O9    | -90.1 (15)  | N8—N9—N10—K1i    | 104.4 (15)  |
| K4—O10—C9—C10   | 98.2 (11)   | N8—N9—N10—N6     | -2 (2)      |
| K4ii—F8—C6—F7   | -86.2 (15)  | N8—N9—N10—K9i    | 97.9 (16)   |
| K4ii—F8—C6—F9   | 160.2 (12)  | N8—N9—N10—K13v   | -164 (2)    |
| K4ii—F8—C6—C5   | 38 (2)      | K9—O9—C9—O10     | -123.5 (16) |
| K4v—N9—N10—K1i  | -104.0 (11) | K9—O9—C9—C10     | 48.0 (18)   |
| K4v—N9—N10—N6   | 149.3 (14)  | K9—O1—C2—O2      | -91 (3)     |
| K4v—N9—N8—K8iv  | -19 (3)     | K9—O1—C2—C1      | 102 (3)     |
| K4v—N9—N8—K3v   | 87.8 (18)   | K9x—F9—C6—F7     | -114.6 (18) |
| K4v—N9—N8—N7    | -123.1 (18) | K9x—F9—C6—F8     | 0 (2)       |
| K4v—N4—N5—N1    | -133.3 (17) | K9x—F9—C6—C5     | 119.6 (18)  |
| K4v—N4—N3—K8iv  | -71.0 (18)  | K9—N1—N2—N3      | 152 (3)     |
| K4v—N4—N3—K7vi  | 151.1 (9)   | K9—N1—N5—N4      | -166.0 (18) |
| K4v—N4—N3—N2    | 77 (2)      | K9—N1—N5—K13v    | 97.1 (19)   |
| K3—O11—C12—K5i  | 124.6 (11)  | K9—N1—N5—K14viii | -127 (2)    |
| K3—O11—C12—K6i  | -151.5 (14) | K10ii—O3—C3—O4   | 122.4 (18)  |
| K3—O11—C12—O12  | 142.7 (10)  | K10ii—O3—C3—C4   | -50 (2)     |
| K3—O11—C12—C11  | -30.9 (17)  | K10ix—F12—C7—F10 | 111.4 (19)  |
| K3vii—F6—C4—F4  | -112.1 (12) | K10ix—F12—C7—F11 | -2 (2)      |
| K3vii—F6—C4—F5  | -0.9 (13)   | K10ix—F12—C7—C8  | -118.4 (19) |
| K3vii—F6—C4—C3  | 118.6 (10)  | K10ii—F4—C4—F6   | -118.3 (12) |
| K3ii—O6—C5—K6   | 49.4 (8)    | K10ii—F4—C4—F5   | 131.2 (10)  |
| K3ii—O6—C5—O5   | 90.6 (15)   | K10ii—F4—C4—C3   | 11.5 (16)   |

|                   |             |                     |             |
|-------------------|-------------|---------------------|-------------|
| K3ii—O6—C5—C6     | -96.4 (11)  | K10—O12—C12—O11     | 89 (3)      |
| K3—O10—C9—O9      | 111.7 (12)  | K10—O12—C12—C11     | -97 (3)     |
| K3—O10—C9—C10     | -60.0 (14)  | K10ii—F2—C1—F3      | 137 (3)     |
| K3ii—F13—C10—F15  | 140.1 (14)  | K10ii—F2—C1—F1      | -109 (3)    |
| K3ii—F13—C10—F14  | -106.0 (15) | K10ii—F2—C1—C2      | 14 (4)      |
| K3ii—F13—C10—C9   | 18.5 (19)   | K10—N6—N10—N9       | -155 (2)    |
| K3v—N9—N10—K4v    | 112 (2)     | K10—N6—N10—K9i      | 84 (2)      |
| K3v—N9—N10—K1i    | 8 (3)       | K10—N6—N10—K13v     | -107 (5)    |
| K3v—N9—N10—N6     | -99 (2)     | K10—N6—N7—N8        | 150.2 (19)  |
| K3v—N9—N8—K8iv    | -107.0 (11) | K10—N6—N7—K12iv     | -45 (3)     |
| K3v—N9—N8—N7      | 149.1 (13)  | K12—O5—C5—O6        | 120.1 (16)  |
| K3viii—N4—N5—K4v  | -89.8 (7)   | K12—O5—C5—C6        | -52.7 (17)  |
| K3viii—N4—N5—N1   | 136.9 (13)  | K12—O4—C3—O3        | 82 (3)      |
| K3viii—N4—N3—K8iv | 87.3 (16)   | K12—O4—C3—C4        | -106 (3)    |
| K3viii—N4—N3—K7vi | -51 (2)     | K12vi—F1—C1—F3      | 109.0 (16)  |
| K3viii—N4—N3—N2   | -124.5 (14) | K12vi—F1—C1—F2      | -4.6 (15)   |
| K2ii—O3—C3—O4     | 143.1 (11)  | K12vi—F1—C1—C2      | -122.2 (15) |
| K2ii—O3—C3—C4     | -29.4 (18)  | K12iv—N6—N10—N9     | 22 (3)      |
| K2ix—F12—C7—F10   | 113.4 (14)  | K12iv—N6—N10—K9i    | -99 (2)     |
| K2ix—F12—C7—F11   | -0.2 (17)   | K12iv—N6—N10—K13v   | 70 (6)      |
| K2ix—F12—C7—C8    | -116.5 (12) | K12iv—N6—N7—N8      | -165 (2)    |
| K2ii—F4—C4—F6     | -133.3 (10) | K12iv—N7—N8—N9      | -162.5 (17) |
| K2ii—F4—C4—F5     | 116.1 (8)   | K12iv—N7—N8—K14v    | -65 (3)     |
| K2ii—F4—C4—C3     | -3.5 (15)   | K11—O2—C2—O1        | -117.2 (18) |
| K2—O1—C2—O2       | 109.4 (13)  | K11—O2—C2—C1        | 50 (2)      |
| K2—O1—C2—C1       | -58.1 (13)  | K11iii—F14—C10—F15  | 109.1 (17)  |
| K2—O12—C12—O11    | 90.2 (14)   | K11iii—F14—C10—F13  | -3.5 (19)   |
| K2—O12—C12—C11    | -95.9 (11)  | K11iii—F14—C10—C9   | -122.8 (16) |
| K2ii—F2—C1—F3     | 123.7 (17)  | K11—O8—C8—O7        | -82 (3)     |
| K2ii—F2—C1—F1     | -121.7 (18) | K11—O8—C8—C7        | 110 (3)     |
| K2ii—F2—C1—C2     | 1 (2)       | K11ii—F5—C4—F4      | -114 (3)    |
| K2—N6—N10—K4v     | -70 (3)     | K11ii—F5—C4—F6      | 132 (3)     |
| K2—N6—N10—K1i     | 87.5 (8)    | K11ii—F5—C4—C3      | 9 (3)       |
| K2—N6—N10—N9      | -141.0 (13) | K11iv—N4—N5—N1      | -17 (3)     |
| K2—N6—N7—K8iv     | 58.6 (18)   | K11iv—N4—N5—K13v    | 105 (2)     |
| K2—N6—N7—K7iv     | -82.2 (15)  | K11iv—N4—N5—K14viii | -166 (3)    |
| K2—N6—N7—N8       | 132.0 (12)  | K11iv—N4—N3—N2      | 166 (3)     |
| K2—N1—N2—K7vi     | 109.4 (13)  | K11iv—N4—N3—K14viii | -52 (3)     |
| K2—N1—N2—N3       | -145.1 (14) | K13—O7—C8—O8        | -122.3 (16) |

|                 |             |                     |             |
|-----------------|-------------|---------------------|-------------|
| K2—N1—N5—K4v    | -12 (3)     | K13—O7—C8—C7        | 45.2 (18)   |
| K2—N1—N5—N4     | 94 (2)      | K13—O10—C9—O9       | -92 (3)     |
| K1—O9—C9—O10    | -143.4 (11) | K13—O10—C9—C10      | 96 (3)      |
| K1—O9—C9—C10    | 28.1 (17)   | K13v—F17—C11—F18    | -118.1 (14) |
| K1—O1—C2—O2     | -93.2 (14)  | K13v—F17—C11—C12    | 119.3 (13)  |
| K1—O1—C2—C1     | 99.3 (11)   | K13v—F17—C11—F16A   | -6 (2)      |
| K1i—O12—C12—O11 | -115.5 (12) | K13ii—F8—C6—F7      | -104 (2)    |
| K1i—O12—C12—C11 | 58.4 (12)   | K13ii—F8—C6—F9      | 142 (2)     |
| K1i—F17—C11—F18 | 130.1 (8)   | K13ii—F8—C6—C5      | 20 (3)      |
| K1i—F17—C11—F16 | -113.5 (11) | K13v—N9—N10—N6      | 161.5 (19)  |
| K1i—F17—C11—C12 | 7.4 (12)    | K13v—N9—N10—K9i     | -98.4 (17)  |
| K1i—N6—N10—K4v  | -157 (3)    | K13v—N9—N8—N7       | -144 (3)    |
| K1i—N6—N10—N9   | 131.5 (17)  | K13v—N9—N8—K12iv    | -160 (3)    |
| K1i—N6—N7—K8iv  | -152.3 (7)  | K13v—N9—N8—K14v     | 78 (4)      |
| K1i—N6—N7—K7iv  | 66.9 (16)   | K14—O11—C12—O12     | 124.0 (16)  |
| K1i—N6—N7—N8    | -78.9 (17)  | K14—O11—C12—C11     | -49.5 (19)  |
| K1—N1—N2—K7vi   | 24 (3)      | K14vii—F6—C4—F4     | -108.6 (15) |
| K1—N1—N2—N3     | 129.8 (16)  | K14vii—F6—C4—F5     | 2.6 (16)    |
| K1—N1—N5—K4v    | 102.2 (13)  | K14vii—F6—C4—C3     | 122.0 (14)  |
| K1—N1—N5—N4     | -151.8 (14) | K14ii—O6—C5—O5      | 88 (3)      |
| O3—C3—C4—F4     | 18.1 (18)   | K14ii—O6—C5—C6      | -99 (2)     |
| O3—C3—C4—F6     | 144.4 (13)  | K14ii—F13—C10—F15   | 150 (3)     |
| O3—C3—C4—F5     | -99.2 (13)  | K14ii—F13—C10—F14   | -96 (3)     |
| O9—C9—C10—F15   | -31.0 (17)  | K14ii—F13—C10—C9    | 29 (3)      |
| O9—C9—C10—F14   | -156.0 (13) | K14viii—N4—N5—N1    | 149.0 (18)  |
| O9—C9—C10—F13   | 85.5 (13)   | K14viii—N4—N5—K13v  | -89.1 (17)  |
| O2—C2—C1—F3     | -24.8 (18)  | K14viii—N4—N3—N2    | -141.9 (18) |
| O2—C2—C1—F1     | -150.5 (13) | K14viii—N4—N3—K11iv | 52 (3)      |

Symmetry code(s): (i)  $x, y-1, z$ ; (ii)  $x, y+1, z$ ; (iii)  $x-1/2, -y+3/2, z$ ; (iv)  $-x+1, -y+1, z+1/2$ ; (v)  $-x+1/2, y-1/2, z+1/2$ ; (vi)  $-x+1, -y+2, z+1/2$ ; (vii)  $x+1/2, -y+3/2, z$ ; (viii)  $-x+1/2, y+1/2, z+1/2$ ; (ix)  $-x+1, -y+1, z-1/2$ ; (x)  $-x+1/2, y+1/2, z-1/2$ .

## 2. Powder X-ray diffraction (PXRD) pattern

The powder pattern of a bulk sample of compounds **1** and **2**, and comparison with the pattern calculated from the single crystal data to prove the phase pure were shown in **Fig. S3**. It could be seen from **Fig. S3a** that the PXRD patterns of the experiment samples and calculated pattern were similar, and most of the peak positions were the same, with fewer miscellaneous peaks, which proved the purity of **1** was consistent with the experimental yield.

The peak positions of compound **2** were also mostly the same as the calculated values as shown in **Fig. S3b**, but there were relatively some miscellaneous peaks from 10 to 20 °, so the yield was slightly lower.

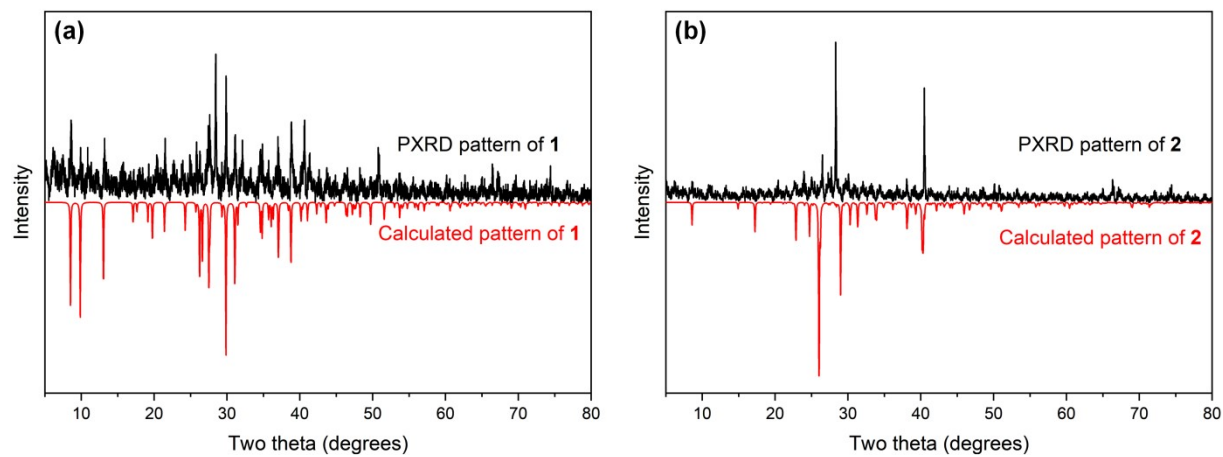

**Fig. S3** (a, b) The PXRD pattern (in black) and the calculated pattern (in red) from their single-crystal structures of **1** and **2**.
